1 **Machine Learning Models Identify Inhibitors of SARS-CoV-2**

2

3 Victor O. Gawriljuk<sup>1</sup>, Phyo Phyo Kyaw Zin<sup>2</sup>, Daniel H. Foil<sup>2</sup>, Jean Bernatchez<sup>3</sup>, Sungjun  
4 Beck<sup>3</sup>, Nathan Beutler<sup>4</sup>, James Ricketts<sup>4</sup>, Linlin Yang<sup>4</sup>, Thomas Rogers<sup>4,5</sup>, Ana C. Puhl<sup>2</sup>,  
5 Kimberley M. Zorn<sup>2</sup>, Thomas R. Lane<sup>2</sup>, Andre S. Godoy<sup>1</sup>, Glaucius Oliva<sup>1</sup>, Jair L.  
6 Siqueira-Neto<sup>3</sup>, Peter B. Madrid<sup>6</sup> and Sean Ekins<sup>2\*</sup>

7

8 <sup>1</sup>São Carlos Institute of Physics, University of São Paulo, Av. João Dagnone, 1100 -  
9 Santa Angelina, São Carlos - SP, 13563-120, Brazil

10

11 <sup>2</sup>Collaborations Pharmaceuticals, Inc., 840 Main Campus Drive, Lab 3510, Raleigh, NC  
12 27606, USA.

13

14 <sup>3</sup>Skaggs School of Pharmacy and Pharmaceutical Sciences, University of California  
15 San Diego, La Jolla, California, 92093, USA.

16

17 <sup>4</sup>The Scripps Research Institute, La Jolla, California, 92093, USA.

18

19 <sup>5</sup>School of Medicine, University of California San Diego, La Jolla, California, 92093,  
20 USA.

21

22 <sup>6</sup>SRI International, 333 Ravenswood Avenue, Menlo Park, CA 94025, USA.

23 **\*Corresponding Author** sean@collaborationspharma.com

24 **Key words:** SARS-CoV-2, COVID-19, Machine learning, drug discovery, Bayesian

25

26 **Abstract**

27

28           With the ongoing SARS-CoV-2 pandemic there is an urgent need for the  
29 discovery of a treatment for the coronavirus disease (COVID-19). Drug repurposing is  
30 one of the most rapid strategies for addressing this need and numerous compounds  
31 have been selected for *in vitro* testing by several groups already. These have led to a  
32 growing database of molecules with *in vitro* activity against the virus. Machine learning  
33 models can assist drug discovery through prediction of the best compounds based on  
34 previously published data. Herein we have implemented several machine learning  
35 methods to develop predictive models from recent SARS-CoV-2 *in vitro* inhibition data  
36 and used them to prioritize additional FDA approved compounds for *in vitro* testing  
37 selected from our in-house compound library. From the compounds predicted with a  
38 Bayesian machine learning model, CPI1062 and CPI1155 showed antiviral activity in  
39 HeLa-ACE2 cell-based assays and represent potential repurposing opportunities for  
40 COVID-19. This approach can be greatly expanded to exhaustively virtually screen  
41 available molecules with predicted activity against this virus as well as a prioritization  
42 tool for SARS-CoV-2 antiviral drug discovery programs. The very latest model for  
43 SARS-CoV-2 is available at [www.assaycentral.org](http://www.assaycentral.org).

44

45

46

47

## 48 **Introduction**

49           In December 2019, several cases of pneumonia with unknown etiology started to  
50 arise in Wuhan, China. A new betacoronavirus was identified and named SARS-CoV-2  
51 due to high similarity with previous SARS-CoV<sup>1,2</sup>. This virus causes the disease which  
52 has been called COVID-19<sup>3</sup>. Since then, SARS-CoV-2 has rapidly spread worldwide  
53 prompting the World Health Organization to declare the outbreak a pandemic, with more  
54 than 1.5 million cases confirmed in less than 100 days.<sup>4</sup> The high infection rate has also  
55 caused considerable stress on global healthcare systems leading to more than 400,000  
56 deaths from COVID-19.

57           The SARS-CoV-2 pandemic started a worldwide effort to discover a treatment  
58 that could prevent further COVID-19 deaths and decrease the number and length of  
59 hospitalization<sup>5</sup>. Drug repurposing is one of the main strategies being used to accelerate  
60 this as most preclinical stages are removed and a promising drug could move directly  
61 into phase II clinical studies or beyond by using an approved, safe drug<sup>6,7</sup>. So far, most  
62 SARS-CoV-2 inhibition studies rely on small to medium scale assays with high  
63 throughput screens (HTS) campaigns testing specific FDA-approved drugs and  
64 compounds that have previously shown inhibition against different betacoronaviruses or  
65 specific antiviral targets<sup>8-16</sup>.

66           Quantitative Structure Activity Relationship (QSAR) analyses from previous *in*  
67 *vitro* data has been widely used to assist drug discovery in both industry and  
68 academia<sup>17</sup>. In the past few years the rise of machine learning has also expanded to  
69 drug discovery, with different methods being implemented in a wide range of areas from  
70 predicting synthetic routes to biological activity<sup>18,19</sup>. Many examples show that

71 prioritizing compounds from machine learning and QSAR models can increase the  
72 success rate and save resources<sup>17</sup>. Here we have implemented several machine  
73 learning methods to develop predictive models from recent SARS-CoV-2 *in vitro*  
74 inhibition data and used them to prioritize compounds for *in vitro* testing of different  
75 compound libraries. These efforts will add to the list of >200 drugs and vaccines under  
76 assessment elsewhere and which is continually growing<sup>20</sup>.

77

## 78 **Materials and Methods**

79

### 80 **Data Curation**

81 Data from recent drug repurposing campaigns for SARS-CoV-2 were used to  
82 build a dataset from whole cell inhibition assays<sup>8,9,12,14,15</sup>. In assays with several  
83 Multiplicity of Infection (MOI) the one closer to the whole dataset was chosen. In  
84 machine learning model generation, duplicate compounds with finite activities are  
85 averaged into a single entry. Due to the potential for diminished activity, when duplicate  
86 compounds were present, only the most active one was retained in the dataset.  
87 Additionally, compounds with ambiguous dose-response curves were discarded.  
88 Datasets were built with Molecular Notebook (Molecular Materials Informatics, Inc). In  
89 order to evaluate the model performance on an external testing set, a total of 30  
90 molecules was collated from different studies<sup>11,21-25</sup>.

91

### 92 **Assay Central™**

93           The Assay Central<sup>TM</sup> software (AC) has been previously described<sup>19,26–34</sup>. AC  
94   employs a series of rules for the detection of problem data for automated structure  
95   standardization to generate high-quality data sets and Bayesian machine learning  
96   models capable of predicting potential bioactivity for proposed compounds. AC was  
97   used to prepare and merge data sets, as well as generate Bayesian models using the  
98   ECFP6 descriptor and five-fold cross validation. During model generation, training  
99   compounds are standardized (i.e. salts were removed, corresponding acids  
100   neutralized), and thresholds for binary activity classification are applied to optimize  
101   internal five-fold cross validation metrics. For predictions, AC workflows assign a  
102   probability score and applicability score to prospective compounds according to a user-  
103   specified model, with prediction scores greater than 0.5 considered active.

104

### 105   **Additional Machine Learning Methods**

106           Additional Machine learning algorithms including Bernoulli Naïve Bayes (bnb),  
107   AdaBoost Decision trees (ada), Random Forest (rf), support vector classification (svc),  
108   k-Nearest Neighbors (knn) and Deep Learning (DL) were also implemented with ECFP6  
109   fingerprints and five-fold cross validation. Details for the development of these models  
110   was previously described in detail in our earlier articles<sup>28,32,35</sup>. Bayesian models were  
111   also generated with Discovery Studio (Biovia, San Diego CA) using ECFP6 descriptors  
112   where the top and bottom scoring fingerprints were selected for qualitative comparison.

113

### 114   **Model Performance**

115 Machine learning model performance was evaluated with different metrics:  
116 accuracy, recall, precision, specificity, F1-score, area under receiver operating  
117 characteristic curve, Cohen's kappa, and the Matthews correlation coefficient. The  
118 statistics were calculated for both training data with five-fold cross validation, to evaluate  
119 training performance, as well as in external testing set, to evaluate model performance  
120 in predicting data outside the training set.

121

## 122 **Principal Component Analysis**

123 Principal Component Analysis (PCA) was computed for both the SARS-CoV-2  
124 data set as well as SARS-CoV-2 with different compound libraries to assess its  
125 chemical space. The scikit-learn<sup>36</sup> (0.22.2) PCA algorithm was used to reduce feature  
126 dimensionality to three using different molecular descriptors (MW, MolLogP, NR, NArR,  
127 NRB, HBA, HBD) and also with EFCP6 fingerprints. Molecular descriptors and  
128 fingerprints were generated from the cheminformatics library RDkit (2020.03.1).

129

## 130 **Applicability and Reliability Domain Assessment**

131 In order to check if it is valid to apply the model for compounds being predicted  
132 and how reliable the predictions are, an applicability and reliability domain assessment  
133 was performed. First, the compound applicability within the model is assessed  
134 comparing its similarity with the model's data using both molecular and fingerprint  
135 descriptors. If the molecule satisfies both criteria it is considered within the applicability  
136 domain and goes to the reliability domain assessment.

137           The first criterion for the applicability assessment is determined based on  
138 whether it fits within the range of the key molecular descriptors of the training set (MW,  
139 MolLogP, NRB, TPSA, HBA, HBD). If at least four properties lie within the maximum  
140 and minimum values of the model's data, the molecule is considered similar and goes to  
141 the next criterion. The second criterion relies on structural fragment-based similarity  
142 measured with Tanimoto coefficient using MACCS fingerprints. The similarity of the  
143 MACCS fingerprints for the query compound and all training data is computed using the  
144 Tanimoto score. Only 5% of the training set compounds that are most similar to the  
145 query compound is used for evaluation (i.e. if the training set has 100 molecules only 5  
146 molecules with more similarity to the query compound are used for the next evaluation).  
147 If the Tanimoto score exceeds 0.5 against the 5% of the training set compounds, the  
148 model is considered to have enough structural fragments overlap with the query  
149 compound and thus the compound goes onto the reliability assessment.

150           The reliability domain assessment implements k-means clustering methods  
151 based on ECFC6 fingerprints to classify the predictions from very high to low reliability.  
152 The reliability class depends on four criteria: distance from the major central point of the  
153 training data, distance from the closest cluster, closest cluster density and closest  
154 cluster distance within the chemical space. Each criterion has different weights and  
155 scores, with the second and third having higher priority. If the compound scores 1 in  
156 each criterion it is classified as very highly reliable, if that is not the case only the two  
157 higher priority criteria are considered for the next classes. The compound is classified  
158 as highly reliable if scores a total of 2, moderately reliable if it scores between -1 and 2  
159 or low reliability if it scores less than or equal to -1 in the two higher priority criteria. The



160 scores for each criterion as well as its definition are extensively described in the  
161 Supplemental Methods.

162

### 163 ***In vitro* testing**

164 Compounds were tested in a 10-point serial dilution experiment to determine the 50%  
165 inhibitory concentration (IC<sub>50</sub>) and 50% cytotoxicity concentration (CC<sub>50</sub>). 1,000 HeLa-  
166 ACE2 cells/well were added into 384-well plates with compounds in a volume of 25 nl.  
167 The final concentrations of compound ranged from 78nM-40μM. 4 h post seeding 500  
168 pfu SARS-CoV-2 (Washington strain USA-WA1/2020), BEI Resources NR-52281 were  
169 added to each well at a MOI = 0.5. Twenty-four hours post infection cells were fixed with  
170 4% formaldehyde solution. The cells were then treated with a Primary ab: human  
171 polyclonal plasma (COVID-19 patient); Secondary ab: goat anti-human IgG coupled  
172 with HRP. Images were acquired with ImageXpress MicroXL (bright field); Custom  
173 Module developed in MetaXpress was used for automated count of total cells and  
174 infected cells. Antiviral activity was assessed based on the infection ratio (number of  
175 infected cells/total number of cells) in comparison with the average infection ration of  
176 the untreated controls.

177

## 178 **Results**

### 179 **Data Curation**

180 *In vitro* SARS-CoV-2 data was initially collated from five drug repurposing studies  
181 leading to a data set of 63 molecules with mean activity of  $15.94 \pm 22.45 \mu\text{M}$ <sup>8,9,12,14,15</sup>.  
182 The external testing set collated from different studies has 30 molecules and a mean

183 activity of  $34 \pm 42 \mu\text{M}$ <sup>11,21-25</sup>. Most assays were performed with different Vero cell lines,  
184 inhibition was measured with viral RNA quantification, cytopathogenic effects or  
185 immunofluorescence methods with MOI and incubation time varying from 0.01-0.05 and  
186 24-72 hrs respectively (Figure S1). The threshold set for activity classification by the  
187 Bayesian model generated with AC was  $6.65 \mu\text{M}$ , with a final ratio of 52% actives in the  
188 training set and 37% in the external test set. The molecules in both training and test set  
189 are available in the supplemental data.

190

### 191 **Machine Learning Models**

192 Machine learning models were developed with AC as well as several other  
193 methods available to us. This five-fold cross validation comparison shows the different  
194 prediction statistics for all machine learning algorithms implemented with the training  
195 data only (Table 1). AC outperformed all of them at the threshold of  $6.65 \mu\text{M}$  with Rf  
196 coming the closest. These models were chosen for further external testing predictions.

197

198 **Table 1 – Five-fold cross validation statistics for all SARS-CoV-2 machine**  
199 **learning models implemented using ECFP6 fingerprints.**

|            | <b>ACC</b> | <b>AUC</b> | <b>CK</b> | <b>MCC</b> | <b>Pr</b> | <b>Recall</b> | <b>Sp</b> | <b>F1</b> |
|------------|------------|------------|-----------|------------|-----------|---------------|-----------|-----------|
| <b>AC</b>  | 0.81       | 0.78       | 0.62      | 0.64       | 0.78      | 0.88          | 0.73      | 0.83      |
| <b>rf</b>  | 0.75       | 0.74       | 0.49      | 0.5        | 0.73      | 0.82          | 0.67      | 0.77      |
| <b>knn</b> | 0.71       | 0.71       | 0.43      | 0.42       | 0.71      | 0.76          | 0.67      | 0.74      |
| <b>svc</b> | 0.7        | 0.69       | 0.39      | 0.4        | 0.68      | 0.79          | 0.6       | 0.73      |
| <b>bnb</b> | 0.68       | 0.68       | 0.36      | 0.36       | 0.7       | 0.7           | 0.67      | 0.7       |

|            |      |      |      |      |      |      |      |      |
|------------|------|------|------|------|------|------|------|------|
| <b>ada</b> | 0.64 | 0.63 | 0.27 | 0.26 | 0.65 | 0.67 | 0.6  | 0.66 |
| <b>DL</b>  | 0.65 | 0.65 | 0.3  | 0.3  | 0.66 | 0.67 | 0.63 | 0.66 |

200  
 201 ACC: Accuracy, AUC: Area under curve, CK: Cohen’s Kappa, MCC: Matthews  
 202 correlation coefficient, Pr: Precision, Sp: Specificity, F1: F1 Score. bnb: Bernoulli Naïve  
 203 Bayes, ada: AdaBoost Decision trees, rf: Random Forest, svc: support vector  
 204 classification, knn: k-Nearest Neighbors and DL: Deep Learning (DL)

205  
 206 **External Validation**

207 The performance of the machine learning models on the external testing data is  
 208 shown in Table 2. The external validation was used to measure model performance in  
 209 data from different studies outside the training set. svc and knn had slightly better  
 210 statistics compared to all other models, with the best balance between recall and  
 211 specificity.

212  
 213 **Table 2 – Prediction statistics with the external data for all SARS-CoV-2**  
 214 **machine learning models implemented**

|            | <b>ACC</b> | <b>AUC</b> | <b>CK</b> | <b>MCC</b> | <b>Pr</b> | <b>Recall</b> | <b>Sp</b> | <b>F1</b> |
|------------|------------|------------|-----------|------------|-----------|---------------|-----------|-----------|
| <b>AC</b>  | 0.62       | 0.58       | 0.17      | 0.17       | 0.50      | 0.40          | 0.76      | 0.44      |
| <b>rf</b>  | 0.63       | 0.57       | 0.10      | 0.11       | 0.42      | 0.30          | 0.80      | 0.35      |
| <b>knn</b> | 0.67       | 0.6        | 0.21      | 0.21       | 0.50      | 0.40          | 0.80      | 0.44      |
| <b>svc</b> | 0.70       | 0.57       | 0.34      | 0.34       | 0.54      | 0.60          | 0.75      | 0.57      |
| <b>bnb</b> | 0.50       | 0.49       | -0.09     | -0.09      | 0.27      | 0.30          | 0.60      | 0.28      |

|            |      |      |      |      |      |      |      |      |
|------------|------|------|------|------|------|------|------|------|
| <b>ada</b> | 0.53 | 0.49 | 0.00 | 0.00 | 0.33 | 0.40 | 0.60 | 0.36 |
| <b>DL</b>  | 0.63 | 0.56 | 0.15 | 0.15 | 0.44 | 0.40 | 0.75 | 0.42 |

215

216

## 217 **Chemical Space**

218         The PCA of the model training set alone shows that the SARS-CoV-2 chemical  
219 space is well distributed with active and inactive molecules well mixed when analyzed  
220 using either molecular and fingerprint descriptors. When compared with Prestwick  
221 Chemical Library (PwCL), a library of predominantly FDA approved drugs, the SARS-  
222 CoV-2 data lie within a big cluster with molecular descriptors and is more widely  
223 distributed when using the fingerprint descriptors.

224

225 **Figure 1** – PCA of the SARS-CoV-2 set with Molecular Descriptors (A), and  
226 ECFP6 (B). Red Spheres – Active, Grey Spheres – Inactive. PCA of SARS-CoV-2 set  
227 and Prestwick Chemical Library (PwCL) with molecular descriptors (C), and ECFP6 (D).  
228 Red Spheres – SARS-CoV-2, Grey Spheres – PwCL

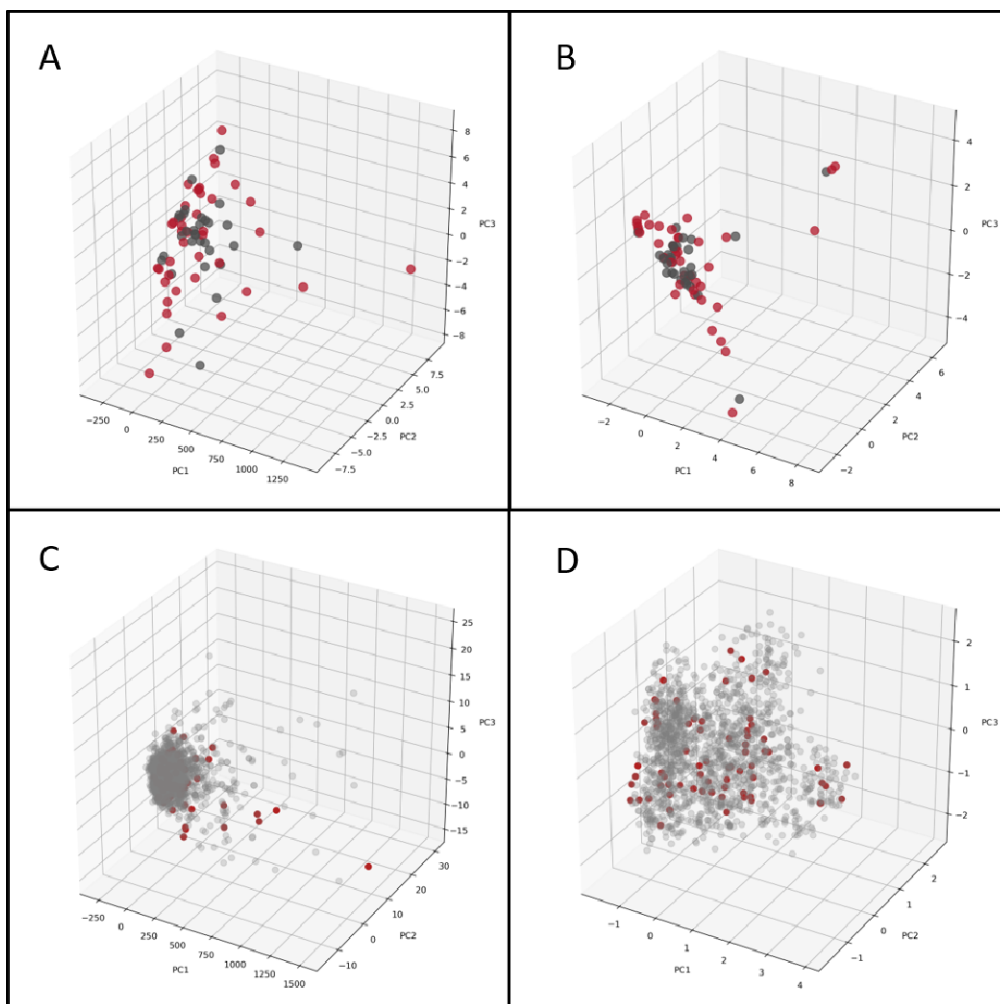

229

### 230 **Applicability and Reliability Domain Assessment of External Test Set**

231 The applicability and reliability domain assessment of the external test set was  
232 determined for each molecule as described in the methods to see how the test set  
233 compares with the training data. Molecules in the applicability domain are considered  
234 suitable for the model predictions due to similarity based on structural and molecular

235 properties with the training data, whereas the reliability value is a measurement of how  
236 reliable the predictions are and uses different clustering metrics to determine its value.

237 From 30 molecules in the external test set, 22 were within the training data  
238 applicability domain and had their reliability value calculated. Most molecules that fell  
239 within the applicability domain had high or very high reliability values, with only 36%  
240 showing moderate reliability, so, most molecules obey the similarity criteria and are not  
241 far away from dense clusters. In comparison, with the Assay Central applicability score,  
242 which accounts only for structural similarity of the query compound with the training  
243 data, only 10 molecules were considered within the domain with a higher reliability,  
244 suggesting it is likely more conservative. Indeed, with the external test and training set  
245 PCA we can see that most molecules superimpose with few of them distant from each  
246 other (Figure S1). Therefore, similarity together with clustering methods are more  
247 suitable for applicability and reliability assessment compared with only structural  
248 similarity, as seen by the PCA.

249

## 250 **Prospective Prediction**

251 A selection of FDA approved drugs available to us in our relatively small in-house  
252 compound collection of hundreds of molecules was scored with the AC Bayesian model.  
253 A selection of some of the best scoring molecules (Table 3) was used to identify and  
254 prioritize compounds for *in vitro* testing. AC Applicability score is the similarity of the  
255 compound with the training data, compounds are ranked by reliability which may  
256 provide some degree of confidence in these predictions.

257

| Name    | Prediction Score | AC Applicability Score | Reliability |
|---------|------------------|------------------------|-------------|
| CPI1062 | 0.67             | 0.5                    | High        |
| CPI1066 | 0.62             | 0.38                   | High        |
| CPI1004 | 0.62             | 0.39                   | High        |
| CPI1012 | 0.70             | 0.70                   | Moderate    |
| CPI1155 | 0.70             | 0.40                   | Moderate    |
| CPI1175 | 0.65             | 0.41                   | Moderate    |
| CPI1153 | 0.7              | 0.7                    | Low         |

258 **Table 3** – Prospective prediction compounds predicted and prioritized for testing.

259

### 260 *In vitro* Inhibition Assays of Predicted Compounds

261 Antiviral activity testing in the HeLa-ACE2 cells demonstrated that CPI1155 and  
262 CPI1062 have antiviral activity with IC<sub>50</sub> values of 8.4μM and 540nM (Figure 2),  
263 respectively. The cell viability of these compounds was also tested, with both CC<sub>50</sub>  
264 higher than 40 μM. Other compounds did not inhibit viral replication in HeLa cells or had  
265 appreciable cytotoxicity.

266

267 **Figure 2** – Preliminary dose response curves for a) CPI1155 and b) CPI1062.

268

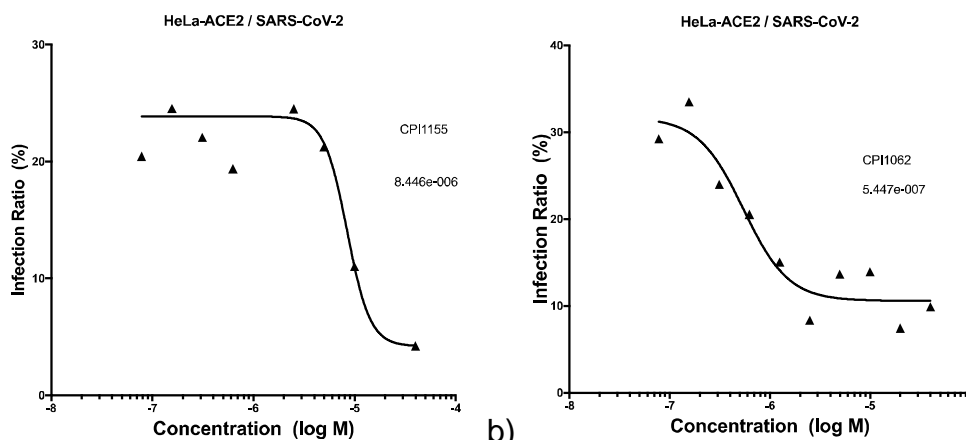

269 a)

b)

270

## 271 Discussion

272 One of the challenges for addressing novel viral outbreaks is selection of drugs  
273 to test. Testing capacity, even for *in vitro* antiviral activities is likely to be low at the  
274 onset of an outbreak, making compound selection even more critical in this situation. In  
275 the case of SARS-CoV-2, the initial focus was on molecules that had previously shown  
276 activity against SARS or MERS<sup>37,38</sup>. The training set for the current model is therefore  
277 not a random sampling of drug property space. When compared with the PwCL, a  
278 library of mostly FDA approved drugs, all molecules superimpose in the property space  
279 highlighting the model suitability for drug repurposing. Even with a relatively small  
280 training dataset the machine learning models evaluated have shown acceptable five-  
281 fold cross validation statistics, with almost all metrics greater than random and ROC  
282 >0.75 for AC (Table 1). When compared with different machine learning methods AC  
283 outperforms all of them in the SARS-CoV-2 training set, but this may be due to the  
284 threshold for all models being set as optimal for AC. However, choosing different values  
285 could imbalance the training set and remove important compounds from the active  
286 group.



287 More important than a good performance in the training set is the performance  
288 on external data, since most prospective predictions will occur for molecules outside  
289 training data. For external validation all models had intermediate performance, with  
290 ROC of 0.6. Taking into account the small number of molecules and that some test set  
291 molecules lie outside the applicability domain, the performance is acceptable. Different  
292 from the training set performance, svc had the highest overall score, predicting 60% of  
293 the active molecules despite its modest statistics in five-fold cross validation. The good  
294 performance of svc in predicting biological activity is in accordance with several studies  
295 that show good performance in different datasets<sup>28,32,35,39</sup>. Therefore, the models  
296 described here are suitable for initial prospective predictions.

297 The applicability and reliability assessment shows that 73% of the test set  
298 molecules lie within the model applicability domain with high to moderate reliability, so  
299 poor performance in external validation occurs because there isn't a clear boundary in  
300 the model's feature space that can correctly classify external data. Increasing the  
301 number of molecules might include new features in both actives and inactive molecules  
302 which can increase model performance in both training and external data.

303 The training and test set described herein can be merged to increase data set  
304 size and applicability domain. The AC model with merged training and test data has  
305 slightly worse statistics (ACC: 0.76, AUC:0.79, CK: 0.53, MCC: 0.75, Pr: 0.76, Recall:  
306 0.76, Sp: 0.77, F1: 0.76), but a higher applicability domain. The PCA confirms this wide  
307 chemical property space (Figure S1), the PCA of this updated model is much more  
308 balanced and broader than the previous one (Figure S2) versus Figure 1B. Without  
309 some form of external validation, we cannot assess how predictions of compounds

310 outside the applicability domain perform, as model statistics were comparable it is  
311 expected that compounds outside this would obviously have unreliable predictions,  
312 however this may be offset by a higher domain which can increase reliability of some  
313 compounds.

314 The molecules of the dataset do not have a common scaffold, but there are  
315 several common structural features that occur in active/inactive molecules that can be  
316 highlighted, such as tertiary amines and aliphatic chains in active molecules and phenyl  
317 rings and peptide molecule features in inactive molecules (Figure S3). These most  
318 common active features appear in chloroquine, tripanarol and tilorone, while the inactive  
319 features appear in darunavir, amprenavir and ritonavir (Figure 3). The lack of common  
320 scaffolds and features that appears in more than 30% of the active or inactive  
321 molecules shows how different and diverse the active molecules are, which turn  
322 classification models for these molecules into a relatively difficult task.

323

324 **Figure 3-** Common Active/Inactive structure features of the SARS-CoV-2 dataset

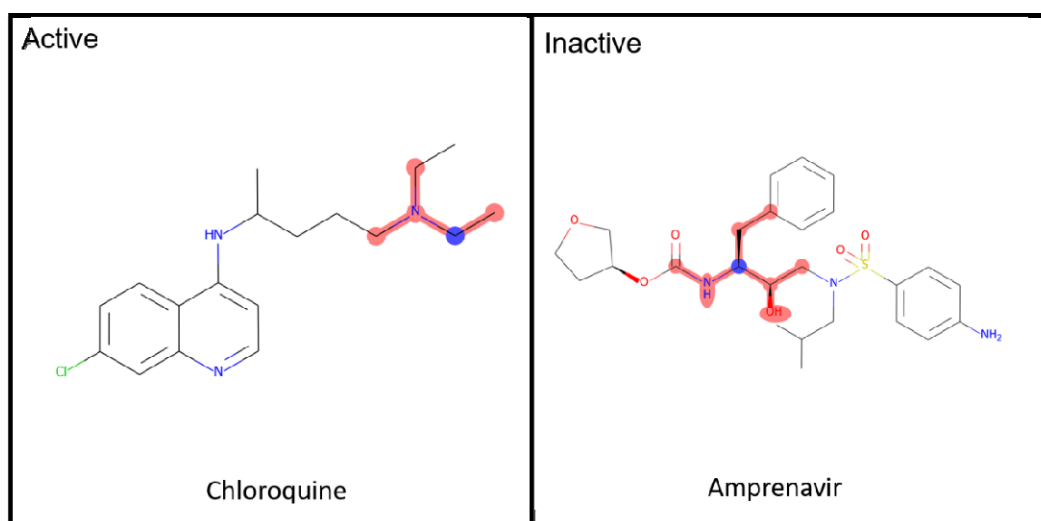

327 The performance of a predictive model is highly dependent on the curation and  
328 data used. One of the main problems that comes from building models with biological  
329 data from different laboratories is data reproducibility and assay standardization<sup>40</sup>. Cell  
330 based assays of viral infections have many parameters that can affect the compound  
331 potency, e.g., cell lines, MOI, assay readout<sup>41</sup>. From all inhibition assays for SARS-CoV-  
332 2 collated to date, most studies use MOI of 0.01-0.05 (73% of data), different Vero cell  
333 lines (77% of data) and qRT-PCR (60% of data), however there is no clear definition of  
334 compound addition time post infection (Figure S1).

335 Besides this, even assays with the same or similar conditions have differences in  
336 'control' compounds such as chloroquine or remdesivir, showing a lack of data  
337 reproducibility between laboratories, which can impact model building. If we keep only  
338 studies with the most in common there is not enough data to build a model, while  
339 merging all studies will have problems of different assay parameters. It was shown that  
340 for Ebola infections in VeroE6 cells the change in the compound potency at different  
341 time post infections are lower when using MOI of 0.01-0.1 therefore, merging different  
342 assays with the same cell line and low MOI is a good choice to avoid data  
343 inconsistency<sup>41</sup>.

344 It should be noted that most of the *in vitro* data collated to date uses Vero or Vero  
345 E6 cells for inhibition assays. Although these cells lines have high ACE2 expression  
346 levels, they lack a TMPRSS2 gene. Priming of viral S proteins can occur with the host  
347 cell protease TMPRSS2 and Cathepsin L and is essential for SARS-CoV-2 entry<sup>42,43</sup>.  
348 Therefore, inhibition assays with cells that do not express TMPRSS2 should be avoided  
349 as they might miss compounds that could inhibit the protein and instead find

350 compounds that prevent virus entry by inhibiting only Cathepsin L. In order to avoid  
351 these problems with the TMPRSS2 and Cathepsin L gene, cell lines like Calu-3 or  
352 modified Vero cell lines should be used instead.<sup>44</sup>

353 From the 7 compounds prioritized for testing in our laboratory using the machine  
354 learning model, CPI1155 and CPI1062 showed antiviral activity against SARS-CoV-2  
355 infections in HeLa-ACE2 cells. Like Vero cells, HeLa does not express TMPRSS2,  
356 therefore compounds might need to be retested in different cell lines to see whether  
357 or not the expression of TMPRSS2 affects compound activity.<sup>45</sup>

358 As new data is continually being published the machine learning models can be  
359 updated to increase performance in terms of both training and external test set  
360 validation. The very latest model for SARS-CoV-2 is available at [www.assaycentral.org](http://www.assaycentral.org).  
361 In the meantime, we have shown these models perform well with internal cross  
362 validation, external validation as well as prospective prediction, enabling us to find  
363 additional active molecules. These models should be used to prioritize compounds  
364 which have both a high prediction score and reliability as described herein. This will be  
365 expected to return more reliable predictions that together with drug discovery expertise  
366 can help prioritize compounds in future for *in vitro* testing.

367

## 368 **Acknowledgements**

369 We would like to kindly acknowledge Dr. Nancy Baker and Ms. Natasha Baker for their  
370 help in collating recently SARS-CoV-2 published data. We also thank Biovia for  
371 supplying Discovery Studio. Per Subcontract: "This material is based upon work  
372 supported by the Defense Advanced Research Projects Agency (DARPA) under

373 Contract No. HR001119C0108." Per DISTAR Form: "The views, opinions, and/or  
374 findings expressed are those of the author(s) and should not be interpreted as  
375 representing the official views or policies of the Department of Defense or the U.S.  
376 Government."

377

## 378 **Funding**

379 We kindly acknowledge NIH funding: R44GM122196-02A1 from NIGMS (PI – Sean  
380 Ekins) and support from DARPA (HR0011-19-C-0108; PI: P. Madrid) is gratefully  
381 acknowledged. Distribution Statement "A" (Approved for Public Release, Distribution  
382 Unlimited). The views, opinions, and/or findings expressed are those of the author and  
383 should not be interpreted as representing the official views or policies of the Department  
384 of Defense or the U.S. Government. FAPESP funding: 2019/25407-2 (PI – Glaucius  
385 Oliva).

386

## 387 **Conflicts of interest**

388 SE is CEO and owner of Collaborations Pharmaceuticals, Inc. DHF, KMZ, TRL, AP are  
389 employees of Collaborations Pharmaceuticals, Inc.

390

## 391 **References**

- 392 1. Wu F, Zhao S, Yu B, et al. A new coronavirus associated with human respiratory  
393 disease in China. *Nature*. 2020;579(7798):265-269. doi:10.1038/s41586-020-  
394 2008-3
- 395 2. Gorbalenya AE, Baker SC, Baric RS, et al. The species Severe acute respiratory  
396 syndrome-related coronavirus: classifying 2019-nCoV and naming it SARS-CoV-  
397 2. *Nat Microbiol*. 2020;5(March). doi:10.1038/s41564-020-0695-z

- 398 3. WHO. Naming the coronavirus disease (COVID-2019) and the virus that causes  
399 it.
- 400 4. Practice BB. Coronavirus disease 2019. *World Heal Organ*.  
401 2020;2019(April):2633. doi:10.1001/jama.2020.2633
- 402 5. Kupferschmidt K, Cohen J. Race to find COVID-19 treatments accelerates.  
403 *Science (80- )*. 2020;(March). doi:10.1126/science.367.6485.1412
- 404 6. Harrison C. Coronavirus puts drug repurposing on the fast track. *Nat Biotechnol*.  
405 February 2020. doi:10.1038/d41587-020-00003-1
- 406 7. Baker NC, Ekins S, Williams AJ, Tropsha A. A bibliometric review of drug  
407 repurposing. *Drug Discov Today*. 2018;23(3):661-672.  
408 doi:10.1016/j.drudis.2018.01.018
- 409 8. Jeon S, Ko M, Lee J, et al. Identification of antiviral drug candidates against  
410 SARS-CoV-2 from FDA-approved drugs. *bioRxiv*. 2020:2020.03.20.999730.  
411 doi:10.1101/2020.03.20.999730
- 412 9. Weston S, Haupt R, Logue J, Matthews K, Frieman MB. FDA approved drugs with  
413 broad anti-coronaviral activity inhibit SARS-CoV-2 in vitro. 2020;(3).
- 414 10. Sheahan TP, Sims AC, Zhou S, et al. An orally bioavailable broad-spectrum  
415 antiviral inhibits SARS-CoV-2 and multiple endemic, epidemic and bat  
416 coronavirus. *bioRxiv*. 2020;(153):2020.03.19.997890.  
417 doi:10.1101/2020.03.19.997890
- 418 11. Caly L, Druce JD, Catton MG, Jans DA, Wagstaff KM. The FDA-approved Drug  
419 Ivermectin inhibits the replication of SARS-CoV-2 in vitro. *Antiviral Res*.  
420 2020:104787. doi:10.1016/j.antiviral.2020.104787
- 421 12. Jin Z, Du X, Xu Y, et al. Structure of Mpro from COVID-19 virus and discovery of  
422 its inhibitors. *bioRxiv*. 2020:2020.02.26.964882. doi:10.1101/2020.02.26.964882
- 423 13. Zhang J, Ma X, Yu F, et al. Teicoplanin potently blocks the cell entry of 2019-  
424 nCoV. *bioRxiv*. 2020.
- 425 14. Wang M, Cao R, Zhang L, et al. Remdesivir and chloroquine effectively inhibit the  
426 recently emerged novel coronavirus (2019-nCoV) in vitro. *Cell Res*.  
427 2020;30(3):269-271. doi:10.1038/s41422-020-0282-0
- 428 15. Liu J, Cao R, Xu M, et al. Hydroxychloroquine, a less toxic derivative of

- 429 chloroquine, is effective in inhibiting SARS-CoV-2 infection in vitro. *Cell Discov.*  
430 2020;6(1):16. doi:10.1038/s41421-020-0156-0
- 431 16. Soares VC, Gomes S, Temerozo JR, et al. Atazanavir inhibits SARS-CoV-2  
432 replication and pro-inflammatory cytokine production. 2020.
- 433 17. Cherkasov A, Muratov EN, Fourches D, et al. QSAR modeling: Where have you  
434 been? Where are you going to? *J Med Chem.* 2014;57(12):4977-5010.  
435 doi:10.1021/jm4004285
- 436 18. Lima AN, Philot EA, Trossini GHG, Scott LPB, Maltarollo VG, Honorio KM. Use of  
437 machine learning approaches for novel drug discovery. *Expert Opin Drug Discov.*  
438 2016;11(3):225-239. doi:10.1517/17460441.2016.1146250
- 439 19. Ekins S, Puhl AC, Zorn KM, et al. Exploiting machine learning for end-to-end drug  
440 discovery and development. *Nat Mater.* 2019;18(5):435-441. doi:10.1038/s41563-  
441 019-0338-z
- 442 20. A P. Vanquishing the Virus: 160+ COVID-19 Drug and Vaccine Candidates in  
443 Development. [https://www.genengnews.com/a-lists/vanquishing-the-virus-160-](https://www.genengnews.com/a-lists/vanquishing-the-virus-160-covid-19-drug-and-vaccine-candidates-in-development/)  
444 [covid-19-drug-and-vaccine-candidates-in-development/](https://www.genengnews.com/a-lists/vanquishing-the-virus-160-covid-19-drug-and-vaccine-candidates-in-development/). Published 2020.  
445 Accessed May 3, 2020.
- 446 21. Riva L, Yuan S, Yin X, et al. A Large-scale Drug Repositioning Survey for SARS-  
447 CoV-2 Antivirals. 2020.
- 448 22. Su H, Yao S, Zhao W, Li M, Liu J, Shang W. Discovery of baicalin and baicalein  
449 as novel , natural product inhibitors of SARS-CoV-2 3CL protease in vitro. 2020:1-  
450 29.
- 451 23. Sheahan TP, Sims AC, Zhou S, et al. An orally bioavailable broad-spectrum  
452 antiviral inhibits SARS-CoV-2 in human airway epithelial cell cultures and multiple  
453 coronaviruses in mice. *Sci Transl Med.* 2020;5883(April).  
454 doi:10.1126/scitranslmed.abb5883
- 455 24. Touret F, Gilles M, Barral K, Nougairède A, Decroly E. In vitro screening of a FDA  
456 approved chemical library reveals potential inhibitors of SARS-CoV-2 replication.  
457 *bioRxiv.* 2020.
- 458 25. Xu T. Indomethacin has a potent antiviral activity against SARS CoV-2 in vitro and  
459 canine coronavirus in vivo Abstract□: 2020;(December 2019).

- 460 26. Ekins S, Gerlach J, Zorn KM, Antonio BM, Lin Z, Gerlach A. Repurposing  
461 Approved Drugs as Inhibitors of K(v)7.1 and Na(v)1.8 to Treat Pitt Hopkins  
462 Syndrome. *Pharm Res.* 2019;36(9):137. doi:10.1007/s11095-019-2671-y
- 463 27. Dalecki AG, Zorn KM, Clark AM, et al. High-throughput screening and Bayesian  
464 machine learning for copper-dependent inhibitors of Staphylococcus aureus.  
465 *Metallomics.* 2019;11(3):696-706. doi:10.1039/c8mt00342d
- 466 28. Zorn KM, Lane TR, Russo DP, Clark AM, Makarov V, Ekins S. Multiple Machine  
467 Learning Comparisons of HIV Cell-based and Reverse Transcriptase Data Sets.  
468 *Mol Pharm.* 2019;16(4):1620-1632. doi:10.1021/acs.molpharmaceut.8b01297
- 469 29. Anantpadma M, Lane T, Zorn KM, et al. Ebola Virus Bayesian Machine Learning  
470 Models Enable New in Vitro Leads. *ACS omega.* 2019;4(1):2353-2361.  
471 doi:10.1021/acsomega.8b02948
- 472 30. Wang P-F, Neiner A, Lane TR, Zorn KM, Ekins S, Kharasch ED. Halogen  
473 Substitution Influences Ketamine Metabolism by Cytochrome P450 2B6: In Vitro  
474 and Computational Approaches. *Mol Pharm.* 2019;16(2):898-906.  
475 doi:10.1021/acs.molpharmaceut.8b01214
- 476 31. Hernandez HW, Soeung M, Zorn KM, et al. High Throughput and Computational  
477 Repurposing for Neglected Diseases. *Pharm Res.* 2018;36(2):27.  
478 doi:10.1007/s11095-018-2558-3
- 479 32. Russo DP, Zorn KM, Clark AM, Zhu H, Ekins S. Comparing Multiple Machine  
480 Learning Algorithms and Metrics for Estrogen Receptor Binding Prediction. *Mol*  
481 *Pharm.* 2018;15(10):4361-4370. doi:10.1021/acs.molpharmaceut.8b00546
- 482 33. Lane T, Russo DP, Zorn KM, et al. Comparing and Validating Machine Learning  
483 Models for Mycobacterium tuberculosis Drug Discovery. *Mol Pharm.*  
484 2018;15(10):4346-4360. doi:10.1021/acs.molpharmaceut.8b00083
- 485 34. Sandoval PJ, Zorn KM, Clark AM, Ekins S, Wright SH. Assessment of Substrate-  
486 Dependent Ligand Interactions at the Organic Cation Transporter OCT2 Using  
487 Six Model Substrates. *Mol Pharmacol.* 2018;94(3):1057-1068.  
488 doi:10.1124/mol.117.111443
- 489 35. Lane T, Russo DP, Zorn KM, et al. Comparing and Validating Machine Learning  
490 Models for Mycobacterium tuberculosis Drug Discovery. *Mol Pharm.*



- 491 2018;15(10):4346-4360. doi:10.1021/acs.molpharmaceut.8b00083
- 492 36. Varoquaux G, Buitinck L, Louppe G, Grisel O, Pedregosa F, Mueller A. Scikit-  
493 learn. *GetMobile Mob Comput Commun*. 2015;19(1):29-33.  
494 doi:10.1145/2786984.2786995
- 495 37. Weston S, Haupt R, Logue J, Matthews K, Frieman M. FDA approved drugs with  
496 broad anti-coronaviral activity inhibit SARS-CoV-2 in vitro. *bioRxiv*.  
497 2020;(3):2020.03.25.008482. doi:10.1101/2020.03.25.008482
- 498 38. Coleman CM, Frieman MB. Coronaviruses: Important Emerging Human  
499 Pathogens. *J Virol*. 2014;88(10):5209-5212. doi:10.1128/jvi.03488-13
- 500 39. Korotcov A, Tkachenko V, Russo DP, Ekins S. Comparison of Deep Learning with  
501 Multiple Machine Learning Methods and Metrics Using Diverse Drug Discovery  
502 Data Sets. *Mol Pharm*. 2017;14(12):4462-4475.  
503 doi:10.1021/acs.molpharmaceut.7b00578
- 504 40. Fourches D, Muratov E, Tropsha A. Trust, but Verify II: A Practical Guide to  
505 Chemogenomics Data Curation. *J Chem Inf Model*. 2016;56(7):1243-1252.  
506 doi:10.1021/acs.jcim.6b00129
- 507 41. Postnikova E, Cong Y, DeWald LE, et al. Testing therapeutics in cell-based  
508 assays: Factors that influence the apparent potency of drugs. *PLoS One*.  
509 2018;13(3):1-18. doi:10.1371/journal.pone.0194880
- 510 42. Hoffmann M, Kleine-Weber H, Schroeder S, et al. SARS-CoV-2 Cell Entry  
511 Depends on ACE2 and TMPRSS2 and Is Blocked by a Clinically Proven Protease  
512 Inhibitor. *Cell*. 2020:1-10. doi:10.1016/j.cell.2020.02.052
- 513 43. Ou X, Liu Y, Lei X, et al. Characterization of spike glycoprotein of SARS-CoV-2 on  
514 virus entry and its immune cross-reactivity with SARS-CoV. *Nat Commun*.  
515 2020;11(1):1620. doi:10.1038/s41467-020-15562-9
- 516 44. Matsuyama S, Nao N, Shirato K, et al. Enhanced isolation of SARS-CoV-2 by  
517 TMPRSS2-expressing cells. *Proc Natl Acad Sci*. 2020:202002589.  
518 doi:10.1073/pnas.2002589117
- 519 45. Shirato K, Kanou K, Kawase M, Matsuyama S. Clinical Isolates of Human  
520 Coronavirus 229E Bypass the Endosome for Cell Entry. *J Virol*. 2017;91(1).  
521 doi:10.1128/jvi.01387-16

522

523

524
